# Supplementary material
Source: PubMed Central journal article supplement (PMC3358905)
Supplement: 1201040109_pnas.201201040SI.pdf [file 1201040109_pnas.201201040SI.pdf]

# Supporting Information

Goldstein et al. 10.1073/pnas.1201040109

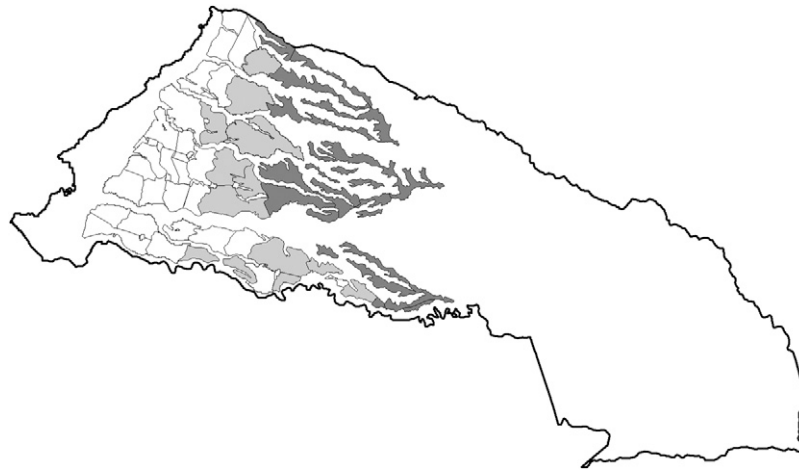

**Fig. S1.** Map of study region showing agricultural field boundaries including the three field groupings used to create the land-use planning scenario maps: low-elevation fields, which currently receive irrigation water (white); mid-elevation fields, which currently do not receive reliable irrigation water but could if improvements were made to the irrigation system (medium gray); and upper-elevation fields that would remain dependent on precipitation (dark gray).

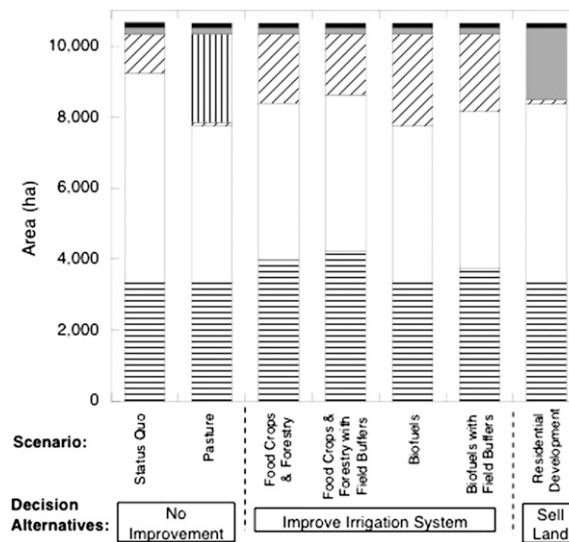

**Fig. S2.** Distribution of land area in general groupings of land use/land cover (LULC) types for each planning scenario. LULC groupings are as follows: native forest and shrubland (horizontal line fill); exotic forest, shrubland, and grassland (white); crop production (diagonal line fill); pasture (vertical line fill); developed lands (gray); and other (black).

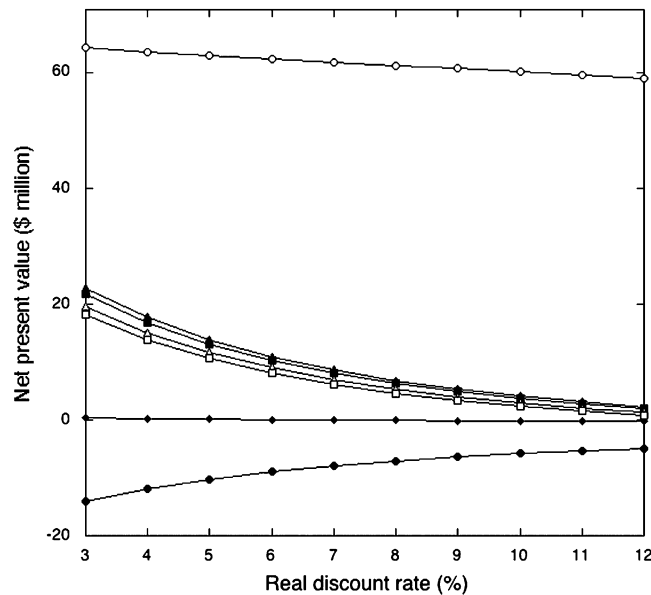

Fig. S3. Sensitivity of financial-return projections for each planning scenario to changes in the real discount rate used to calculate net present value over the model's 50-y time horizon: Status Quo (closed circles), Pasture (diamonds), Food Crops and Forestry (closed triangles), Biofuels (closed squares), Food Crops and Forestry with Field Buffers (open triangles), Biofuels with Field Buffers (open squares), and Residential Development (open circles).

Table S1. Land use/land-cover type assigned to each of the three groups of agricultural fields for creating the planning scenarios

| Decision alternative                                                            | Scenario name                              | Land use/land cover type for each group of agricultural fields* |                                          |                                            |
|---------------------------------------------------------------------------------|--------------------------------------------|-----------------------------------------------------------------|------------------------------------------|--------------------------------------------|
|                                                                                 |                                            | Lower fields                                                    | Middle fields                            | Upper fields                               |
| No improvement to irrigation system                                             | Status Quo                                 | Corn for seed production                                        | Fallow                                   | Fallow                                     |
|                                                                                 | Pasture                                    | Pasture                                                         | Pasture                                  | Pasture                                    |
| Improve irrigation system                                                       | Food Crops and Forestry                    | Vegetable crops                                                 | Vegetable crops                          | Native forestry plantings                  |
|                                                                                 | Food Crops and Forestry with Field Buffers | Vegetable crops with field buffers                              | Vegetable crops with field buffers       | Native forestry plantings                  |
|                                                                                 | Biofuels                                   | Sugarcane (irrigated)                                           | Sugarcane (irrigated)                    | Sugarcane (unirrigated)                    |
|                                                                                 | Biofuels with Field Buffers                | Sugarcane (irrigated) with field buffers                        | Sugarcane (Irrigated) with field buffers | Sugarcane (unirrigated) with field buffers |
| Sell land                                                                       | Residential Development                    | Housing development                                             | Housing development                      | Fallow (not buildable)                     |
| Full restoration (extension to the analysis undertaken in the planning process) | Full Restoration Scenario                  | Native forestry plantings                                       | Native forestry plantings                | Native forestry plantings                  |

\*See Fig. S1.



**Table S3. Nitrogen export coefficients by land use/land cover type used in the water-quality model**

| Land use/land cover type                     | Nitrogen export (kg·ha <sup>-1</sup> ·y <sup>-1</sup> ) |
|----------------------------------------------|---------------------------------------------------------|
| Undefined                                    | 0.1                                                     |
| Native shrubland/sparse ohia (native shrubs) | 1.8                                                     |
| Uluhe shrubland                              | 1.8                                                     |
| Closed ohia forest (native shrubs)           | 1.8                                                     |
| Open koa-ohia forest (uluhe)                 | 1.8                                                     |
| Open ohia forest (uluhe)                     | 1.8                                                     |
| Water                                        | 0.1                                                     |
| Wetland grasses and sedges                   | 1.8                                                     |
| Active agriculture                           | 11.1                                                    |
| alien shrubs and grasses                     | 1.8                                                     |
| Alien trees and shrubs                       | 1.8                                                     |
| High-intensity developed                     | 13.8                                                    |
| Low-intensity developed                      | 7.5                                                     |
| Alien grassland                              | 2.5                                                     |
| Alien shrubland                              | 1.8                                                     |
| Christmas berry shrubland                    | 1.8                                                     |
| Koa haole shrubland                          | 1.8                                                     |
| Alien forest                                 | 1.8                                                     |
| Closed kukui forest                          | 1.8                                                     |
| Kiawe forest and shrubland                   | 1.8                                                     |
| Kiawe-koa haole forest and shrubland         | 1.8                                                     |
| Uncharacterized forest                       | 1.8                                                     |
| Uncharacterized shrubland                    | 1.8                                                     |
| Very sparse vegetation to unvegetated        | 0.1                                                     |
| Vegetable crops                              | 8                                                       |
| Sugarcane (irrigated)                        | 2.5                                                     |
| Sugarcane (unirrigated)                      | 2.5                                                     |
| Residential development                      | 7.5                                                     |
| Pasture                                      | 3.1                                                     |
| Native forestry                              | 1.8                                                     |
| Agricultural field buffers                   | 1.8                                                     |

**Table S4. Land-rental rates and estimated real estate prices for bulk sale of irrigated and unirrigated agricultural lands used in the financial return model**

| Category                               | Rate (dollars/ha) |
|----------------------------------------|-------------------|
| Feed/seed corn and other nonfood crops | 247               |
| Vegetables                             | 642               |
| Sugarcane (irrigated)                  | 618               |
| Sugarcane (unirrigated)                | 124               |
| Pasture                                | 25                |
| Native forestry                        | 124               |
| Fallow fields                          | 0                 |
| Bulk land sale (irrigated)             | 43,243            |
| Bulk land sale (unirrigated)           | 24,711            |

Real property taxes were \$7.05 ha<sup>-1</sup> for agricultural lands with a tax category dedication and \$528.80 ha<sup>-1</sup> without this dedication; this designation was determined on a field-by-field basis. Net return for each field was calculated by subtracting real property tax from the land rental rate. A real discount rate of 6% was used in calculations, with sensitivity analysis to 3–12%.
